# Supplementary figures and images for: Highly sensitive in situ monitoring of catalytic reactions by surface enhancement Raman spectroscopy on multifunctional Fe3O4/C/Au NPs
Source: Royal Society of Chemistry journal article supplement (doi:10.1039/c4nr01147c), 2014-01-01

### Supporting information:

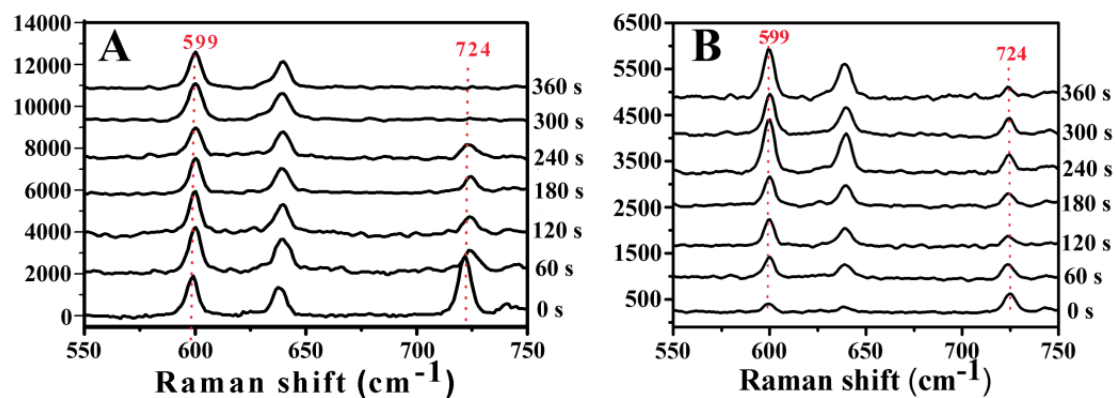

The enlarged peaks at area 550-750  $\text{cm}^{-1}$  of Fig. 3A and Fig. 3B

Supplement: c4nr01147c1.pdf [file c4nr01147c1.pdf]
